# Supplementary material
Source: Royal Society of Chemistry journal article supplement (doi:10.1039/d6ta00024j)
Supplement: d6ta00024j1.pdf [file d6ta00024j1.pdf]

**Supplementary information for**  
**A Theoretical Study on the Cyanation Strategy for**  
**Modulating Borate Performance in the Design of**  
**Electrolytes for High-Voltage Lithium-Ion and Lithium**  
**Metal Batteries**

Jiahao Zhu<sup>a</sup>, Peiyan Li<sup>a</sup>, Zixiang Li<sup>a</sup>, Guoqiang He<sup>a</sup>, Longlong Li<sup>a</sup>, Yingen Feng<sup>a</sup>, Fredrick Mwangi Mulei<sup>c</sup>, Alice A. Kasera<sup>c</sup>, Ronghua Zeng<sup>b\*</sup>, Jianhui Li<sup>a\*</sup>

<sup>a</sup> *School of Materials and New Energy, South China Normal University, Shanwei 516600, Guangdong, China*

<sup>b</sup> *Guangdong Provincial International Joint Research Center for Energy Storage Materials, School of Chemistry, South China Normal University, Guangzhou 510006, Guangdong, China*

<sup>c</sup> *School of Engineering, Mount Kenya University, Thika 342-01000, Kenya*

*E-mail address: [Jianhuili@m.scnu.edu.cn](mailto:Jianhuili@m.scnu.edu.cn) (J Li)*

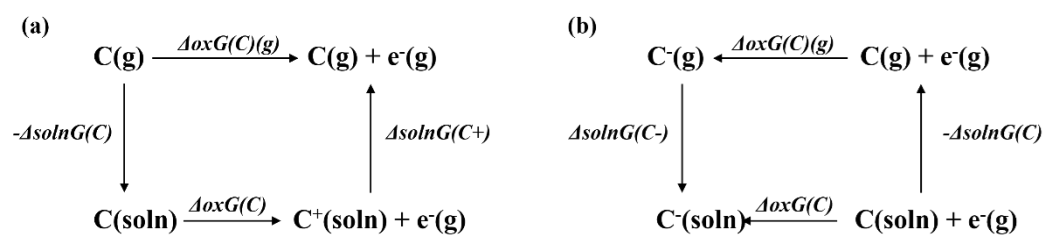

**Figure S1.** Schematic diagram of the thermodynamic cycle.

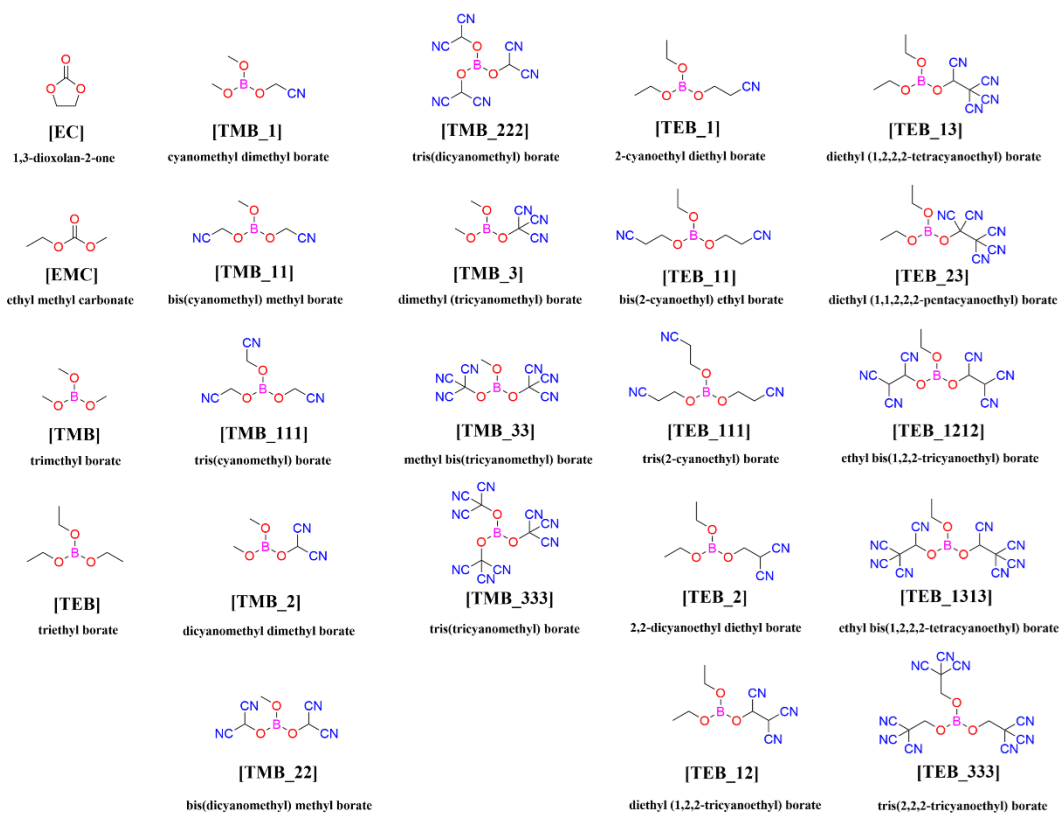

**Figure S2.** The structure and nomenclature of ethylene carbonate (EC), ethyl methyl carbonate (EMC), trimethyl borate (TMB), triethyl borate (TEB) and cyano-modified borates.

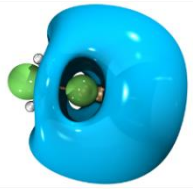

**EC LUMO**

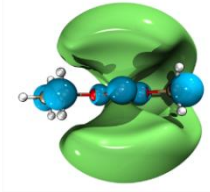

**EMC LUMO**

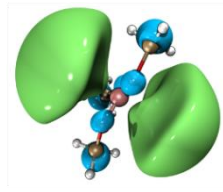

**TMB LUMO**

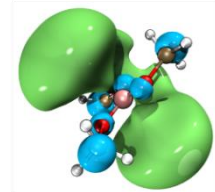

**TMB\_1 LUMO**

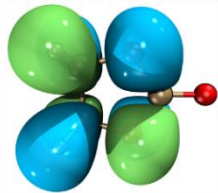

**EC HOMO**

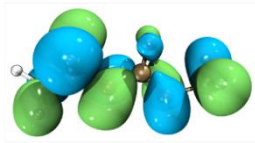

**EMC HOMO**

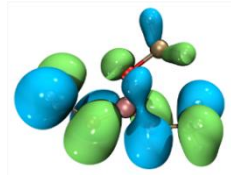

**TMB HOMO**

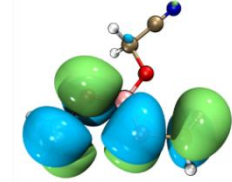

**TMB\_1 HOMO**

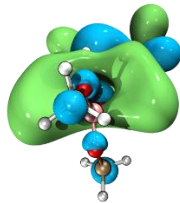

**TMB\_2 LUMO**

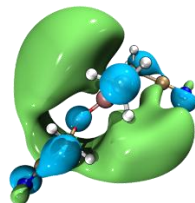

**TMB\_11 LUMO**

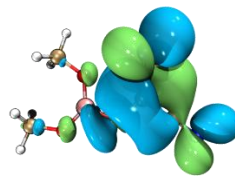

**TMB\_3 LUMO**

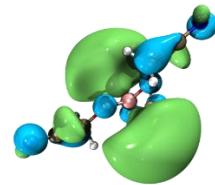

**TMB\_111 LUMO**

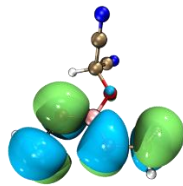

**TMB\_2 HOMO**

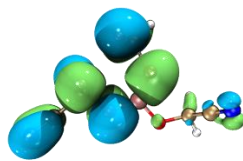

**TMB\_11 HOMO**

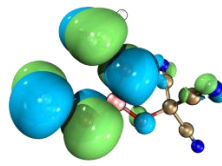

**TMB\_3 HOMO**

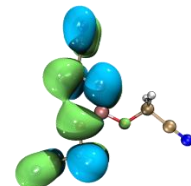

**TMB\_111 HOMO**

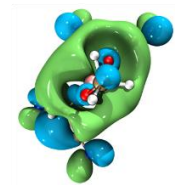

**TMB\_22 LUMO**

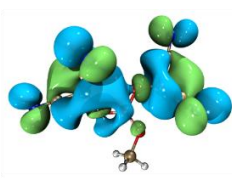

**TMB\_33 LUMO**

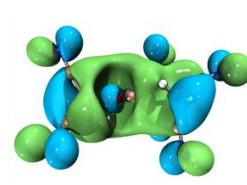

**TMB\_222 LUMO**

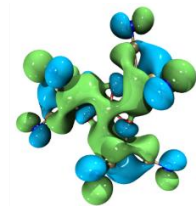

**TMB\_333 LUMO**

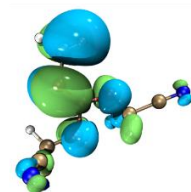

**TMB\_22 HOMO**

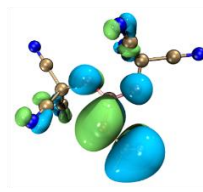

**TMB\_33 HOMO**

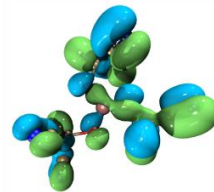

**TMB\_222 HOMO**

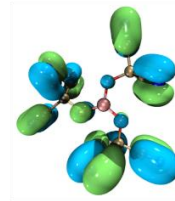

**TMB\_333 HOMO**

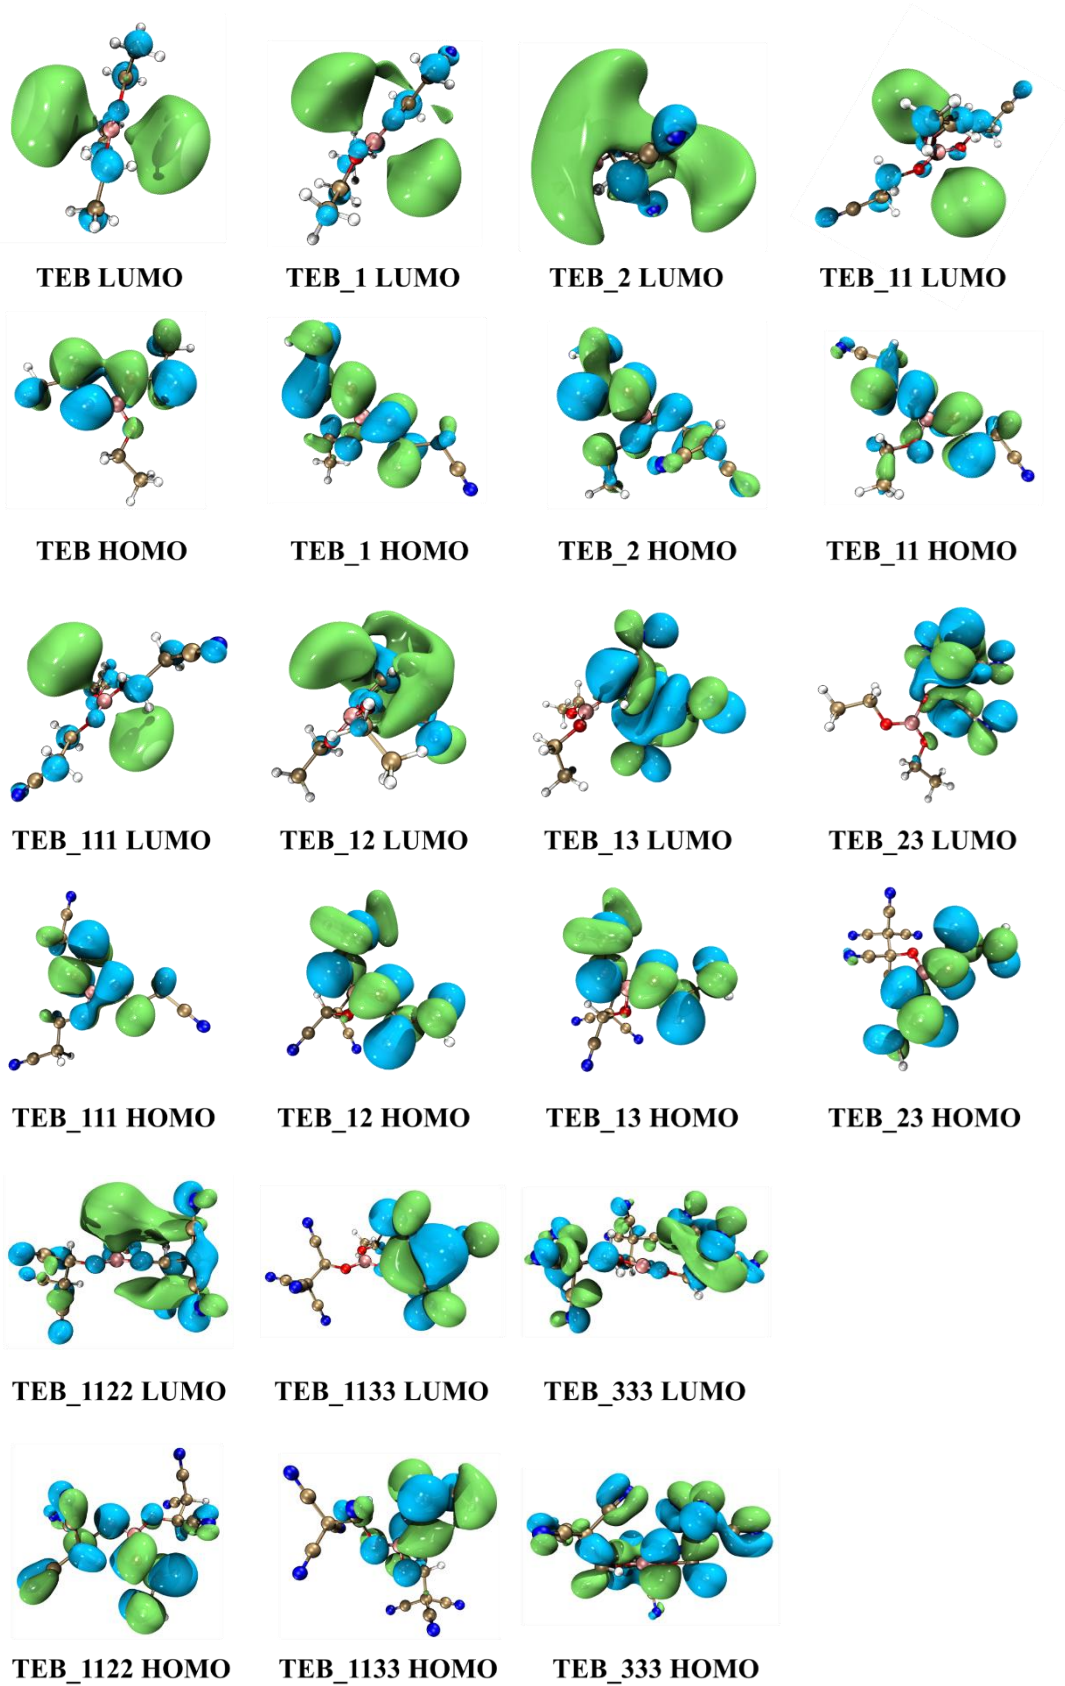

**Figure S3.** Under the 0.02 isovalue surface, the HOMO and LUMO orbital diagrams of 23 molecules.

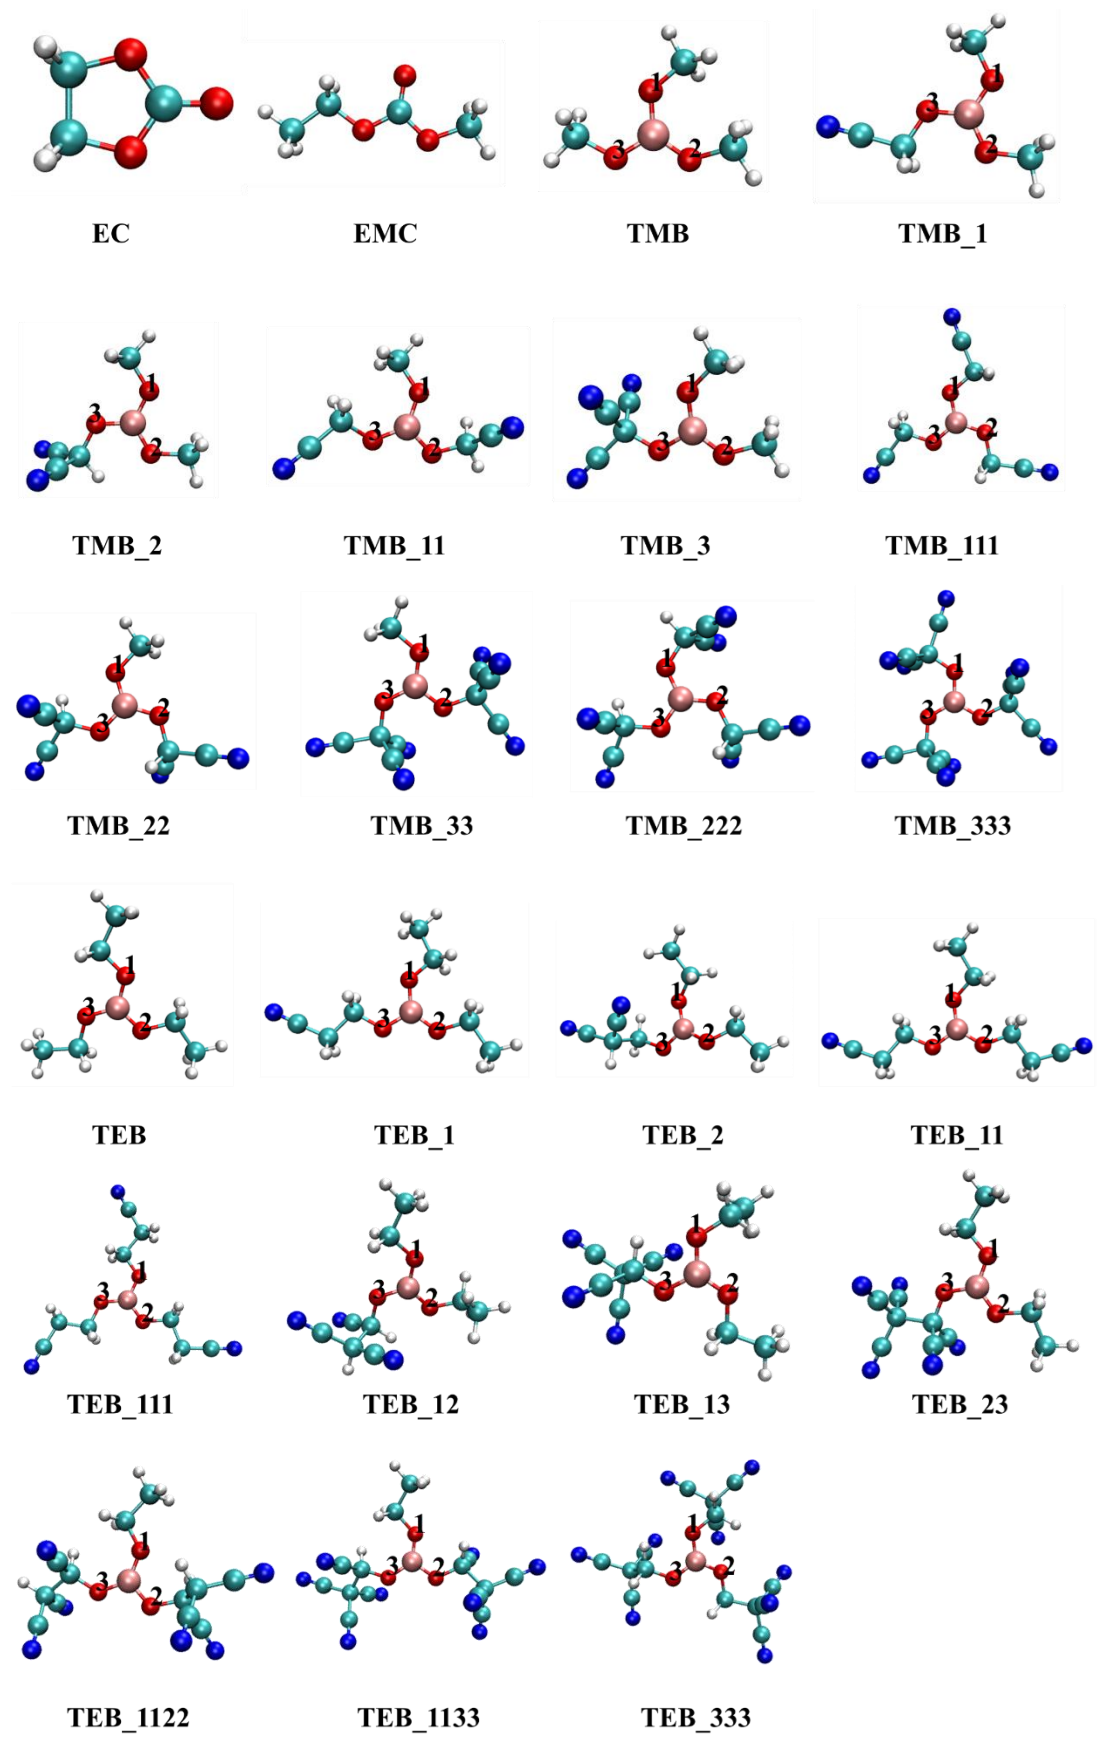

**Figure S4.** The bond position for each molecule correspond to Table S2.

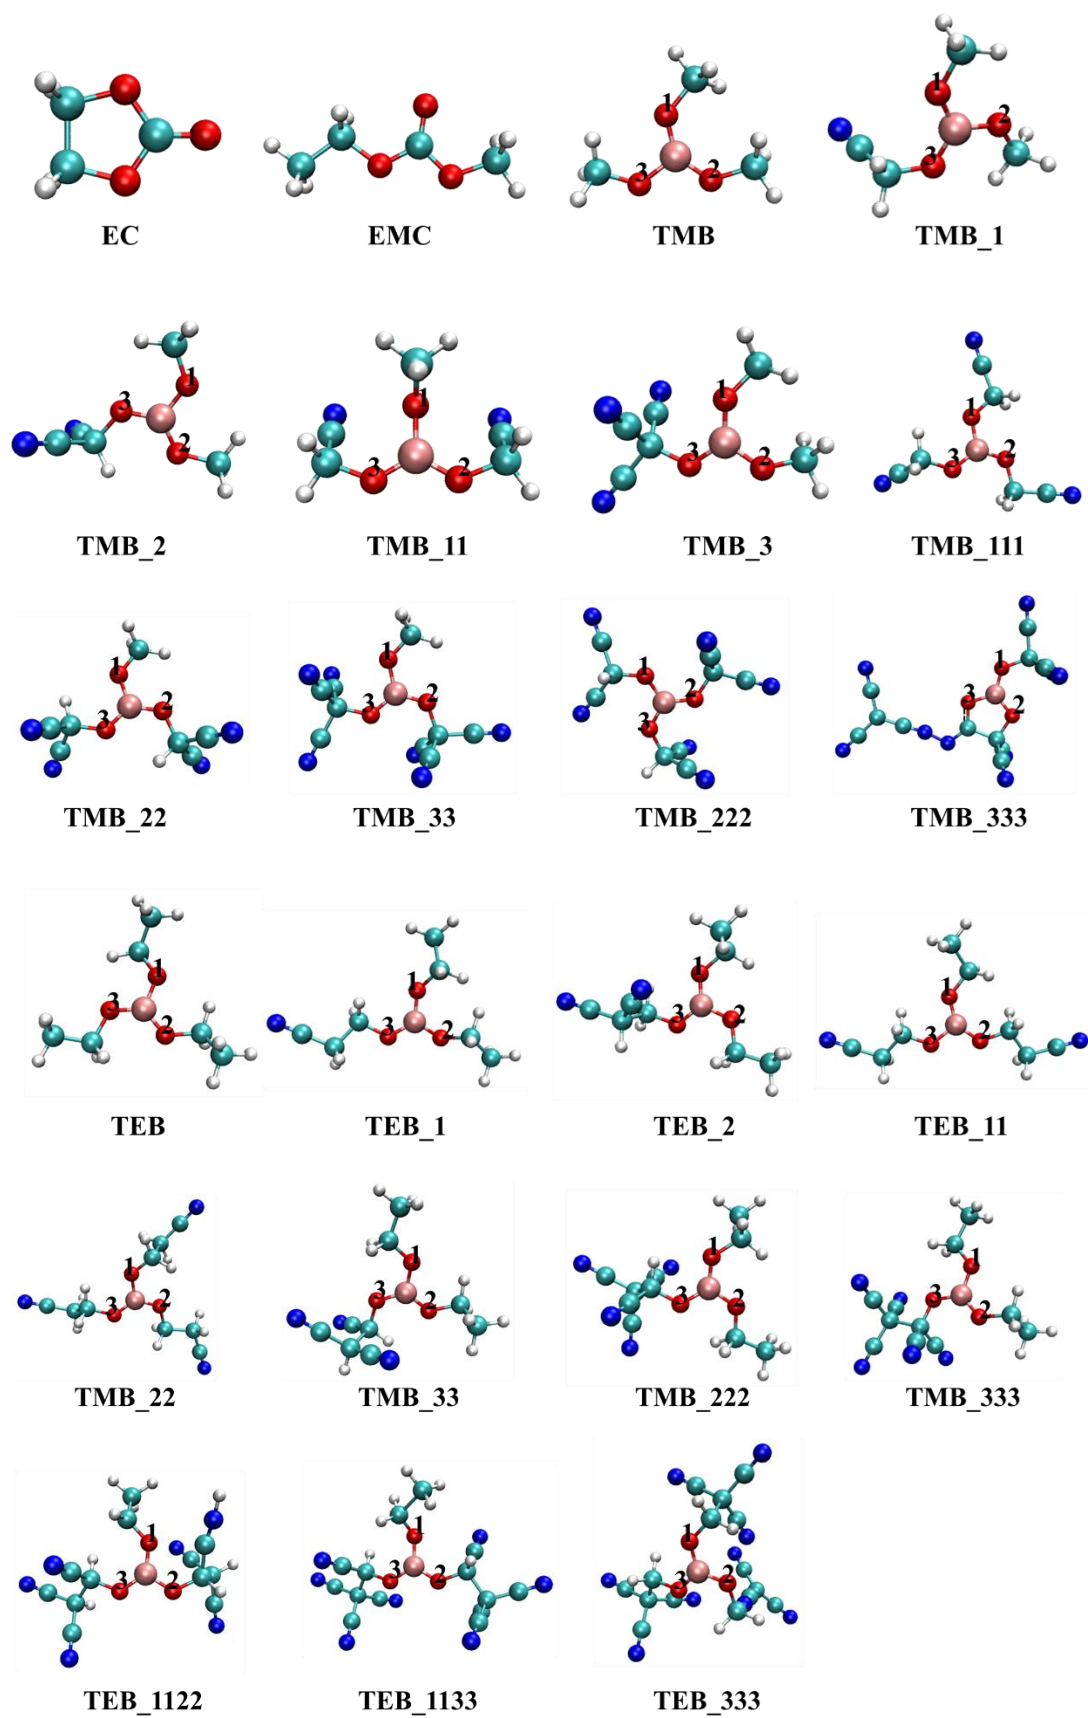

**Figure S5.** The bond position for each molecule in the oxidation state correspond to Table S2.

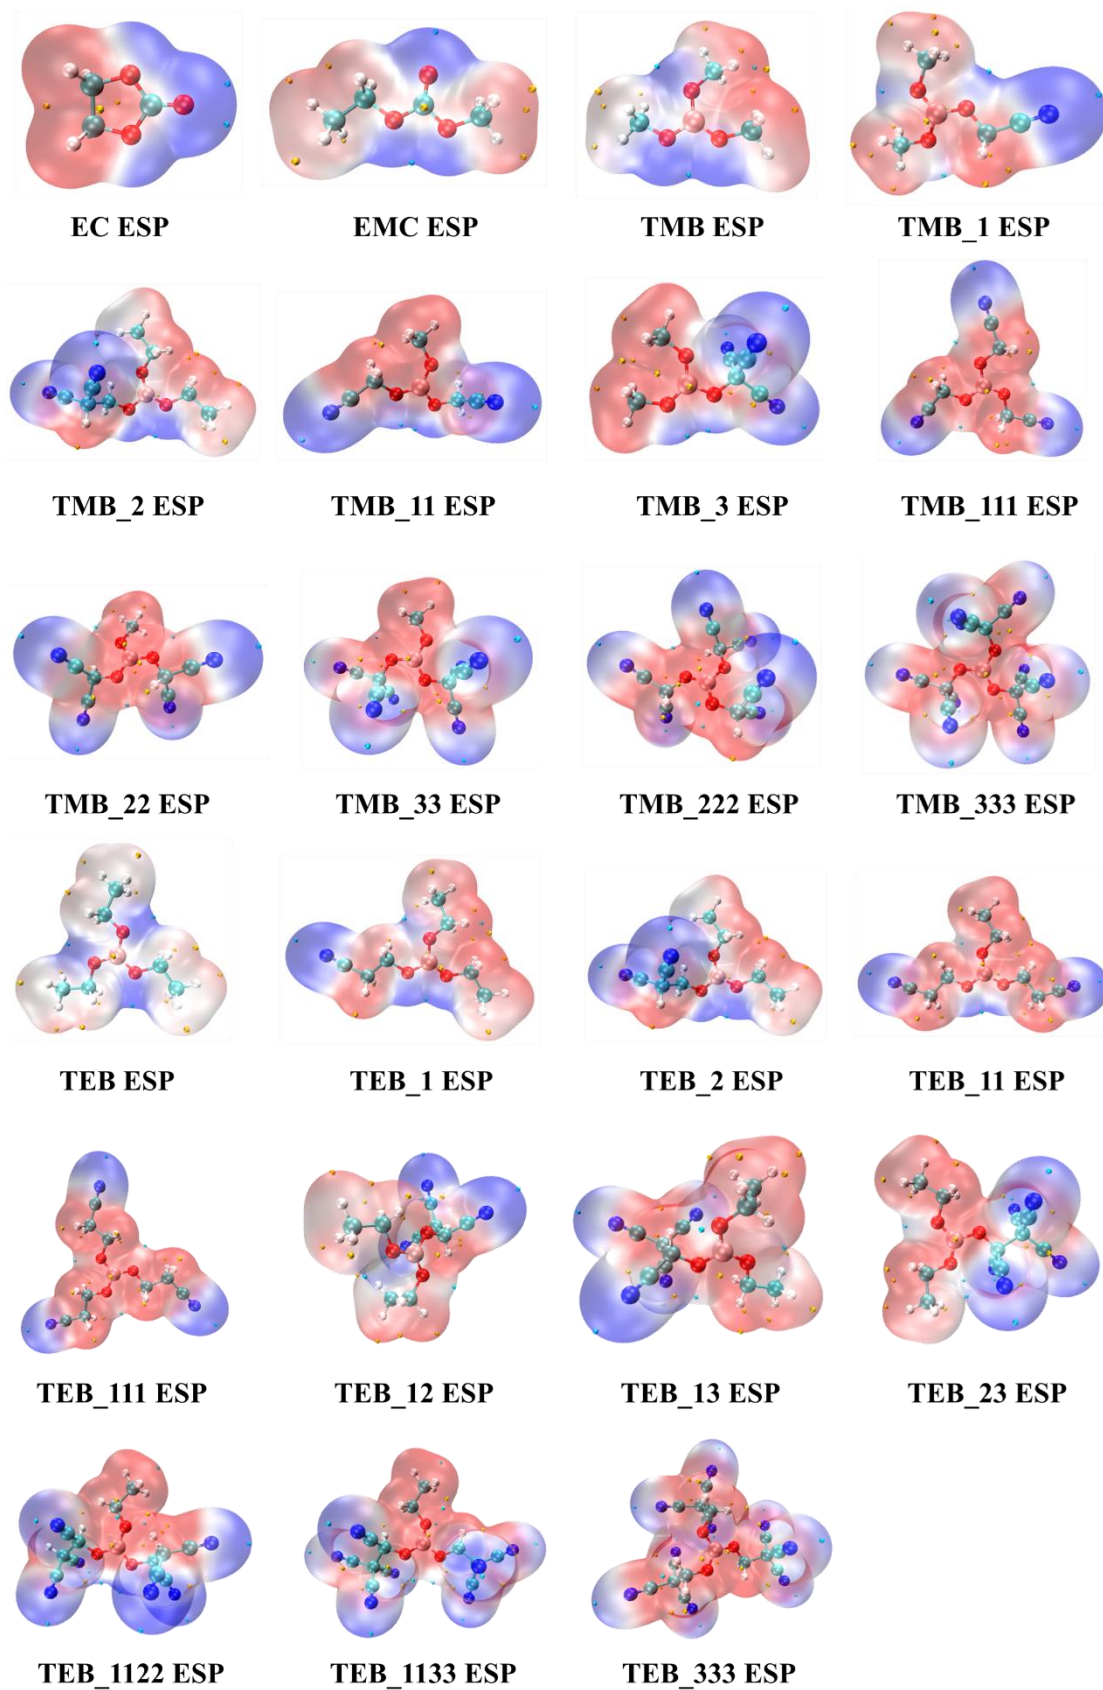

**Figure S6.** Electrostatic potential mapped van der Waals surface (i.e.  $\rho = 0.001$  a.u. isosurface) of all molecules.

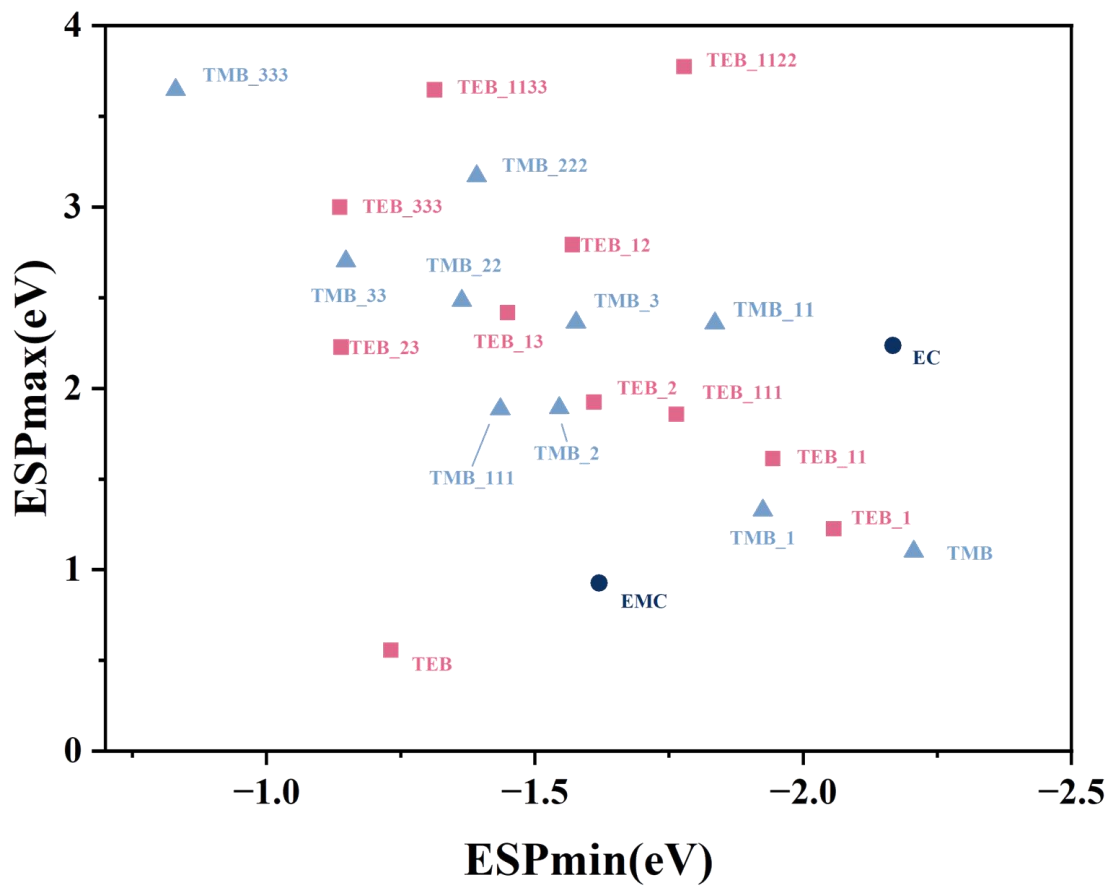

Figure S7. The minimum and maximum electrostatic potential values of all molecules.

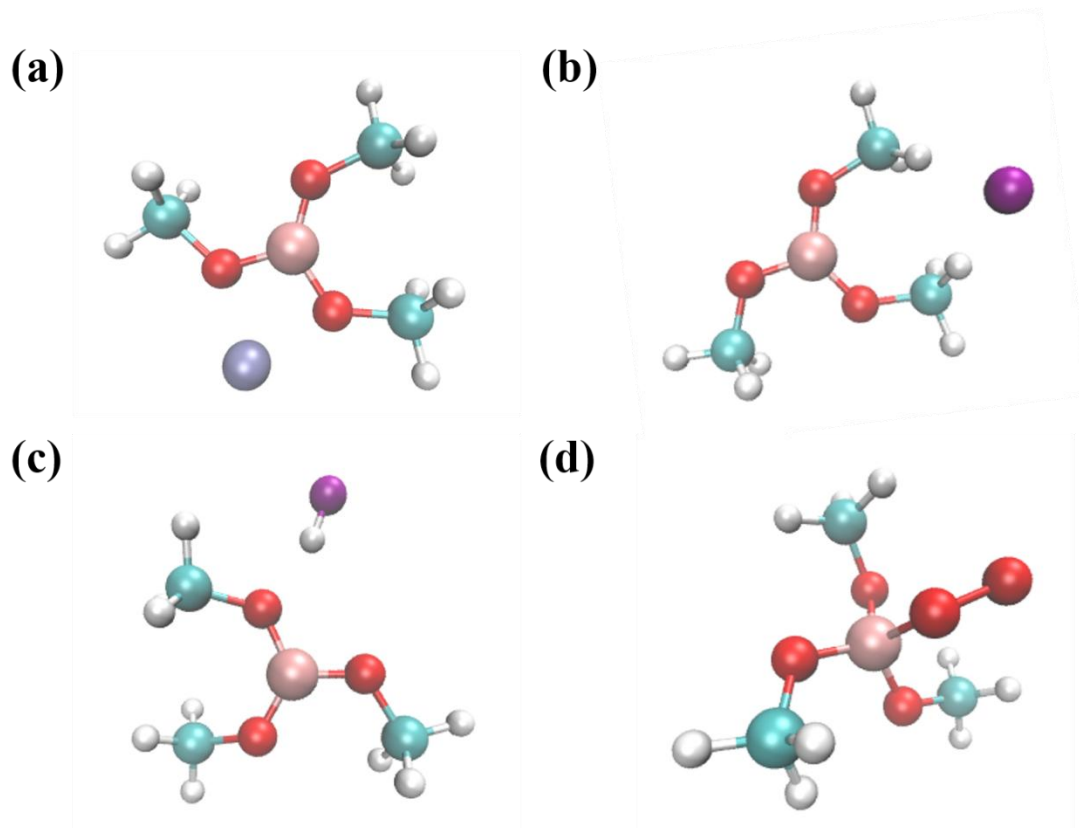

**Figure S8.** The binding site of each molecule to (a)  $\text{Li}^+$  (b)  $\text{F}^-$  (c) HF (d)  $\text{O}_2$ .

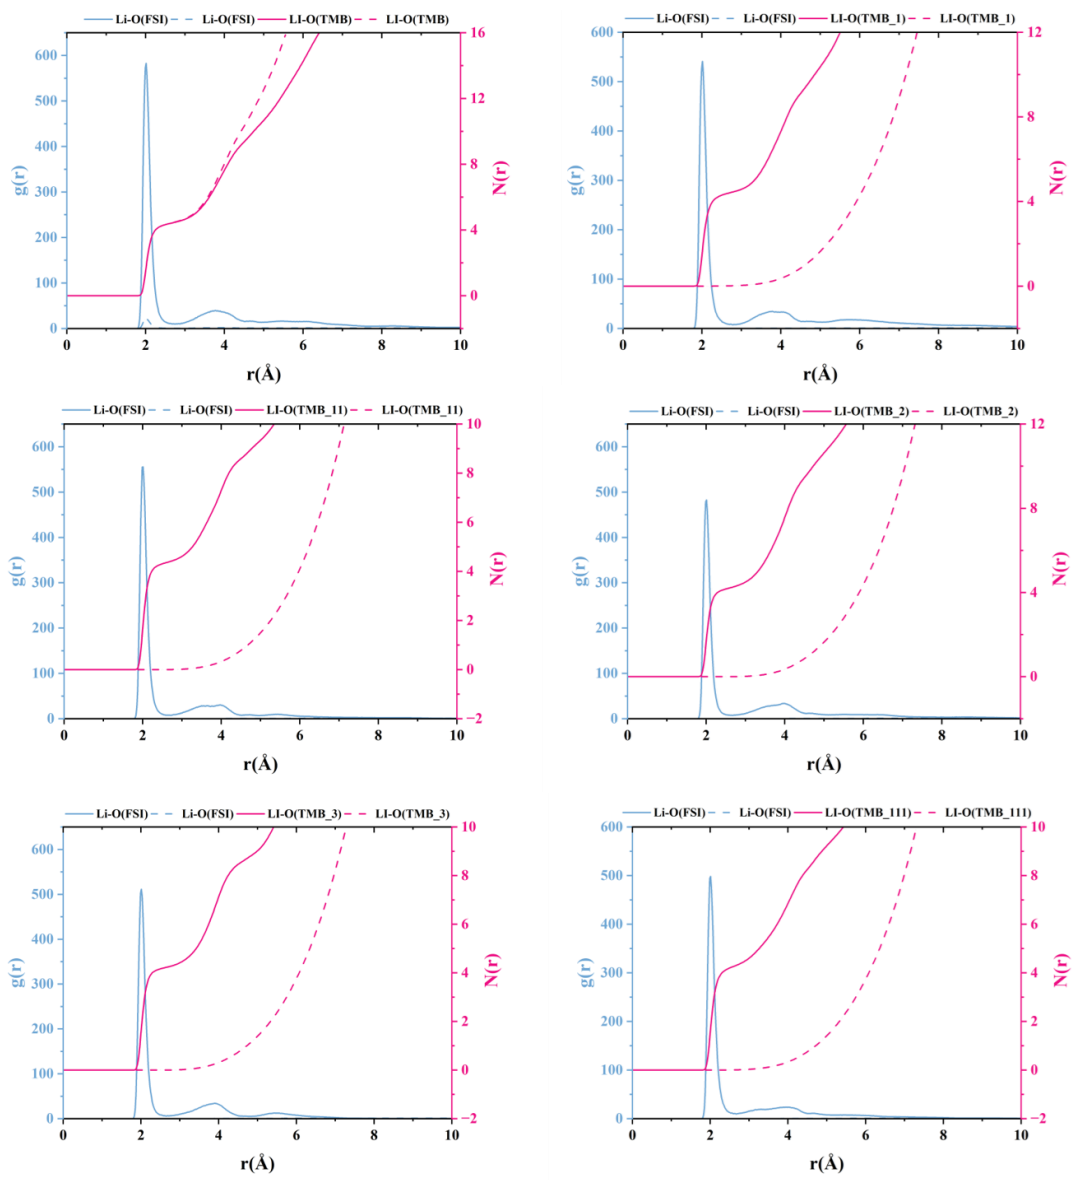

Figure S9. Continued.

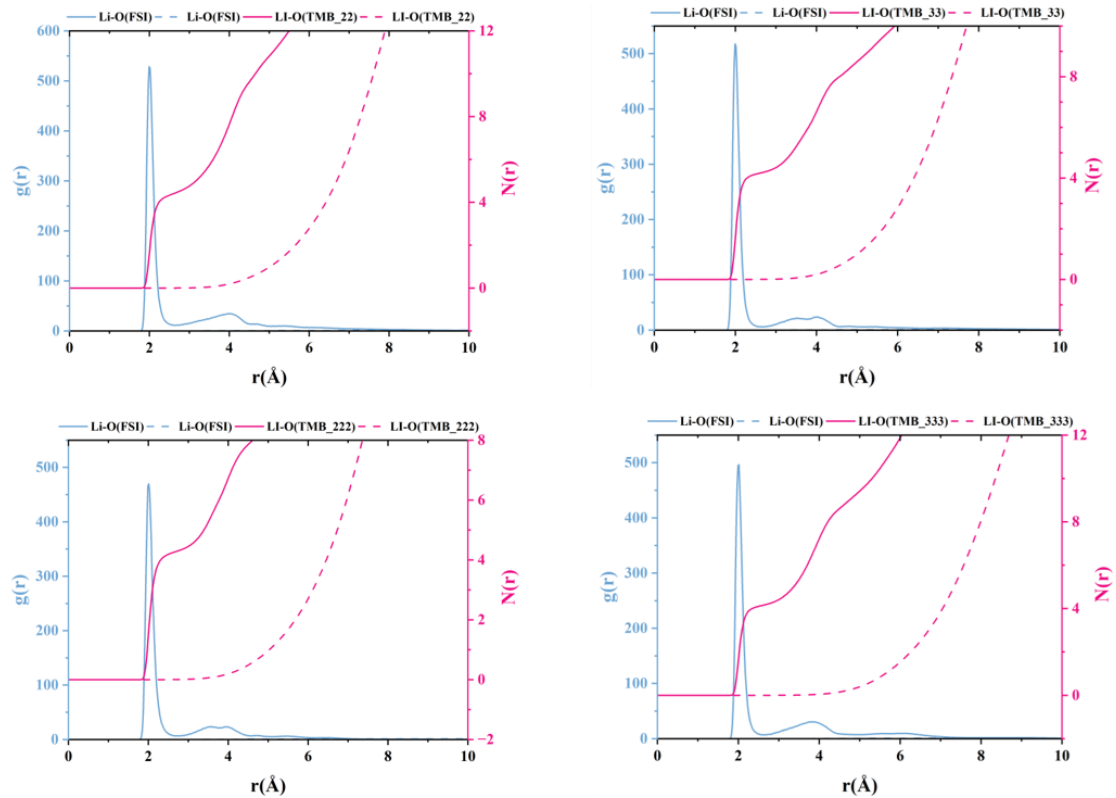

**Figure S9.** The corresponding coordination number and RDF of LiFSI across the TMB series (from TMB TO TMB\_333).

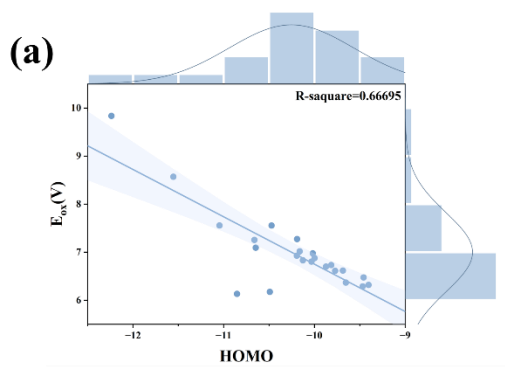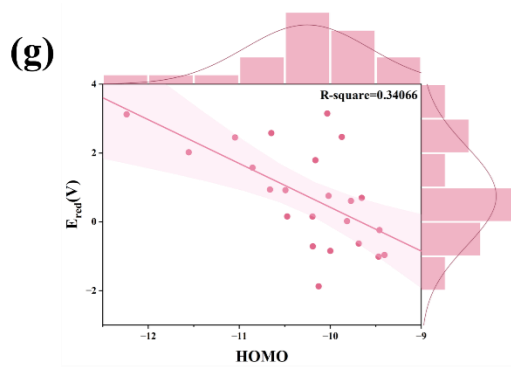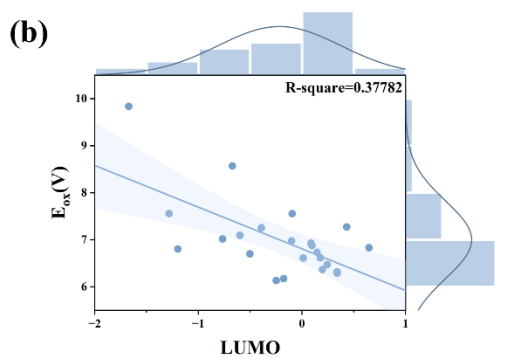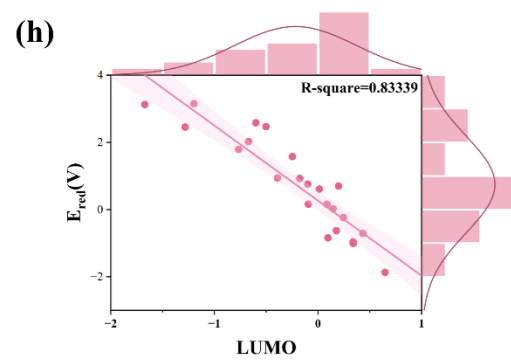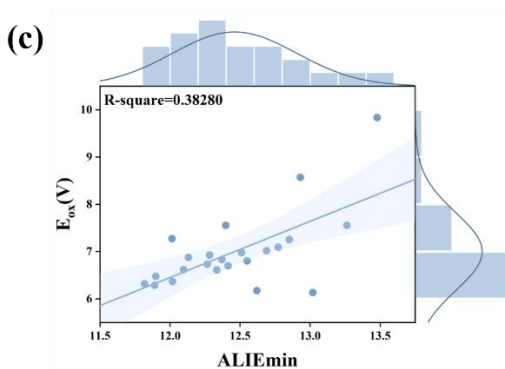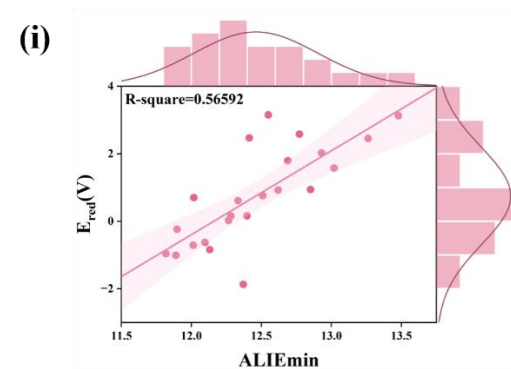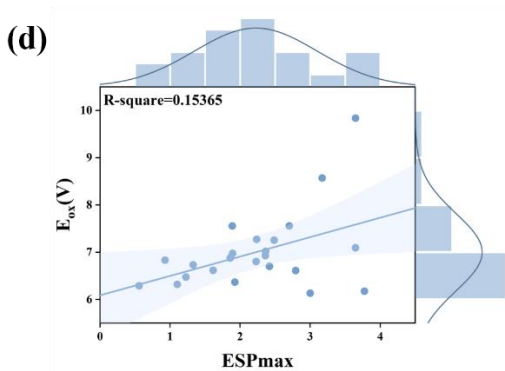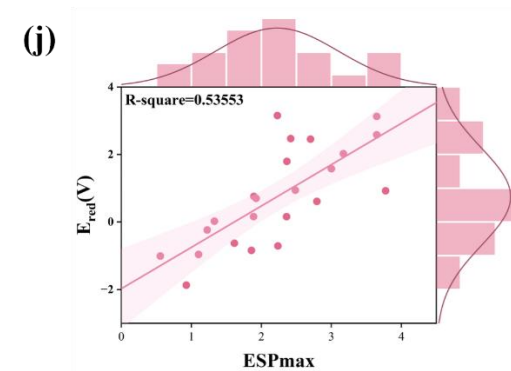

Figure S10. Continued.

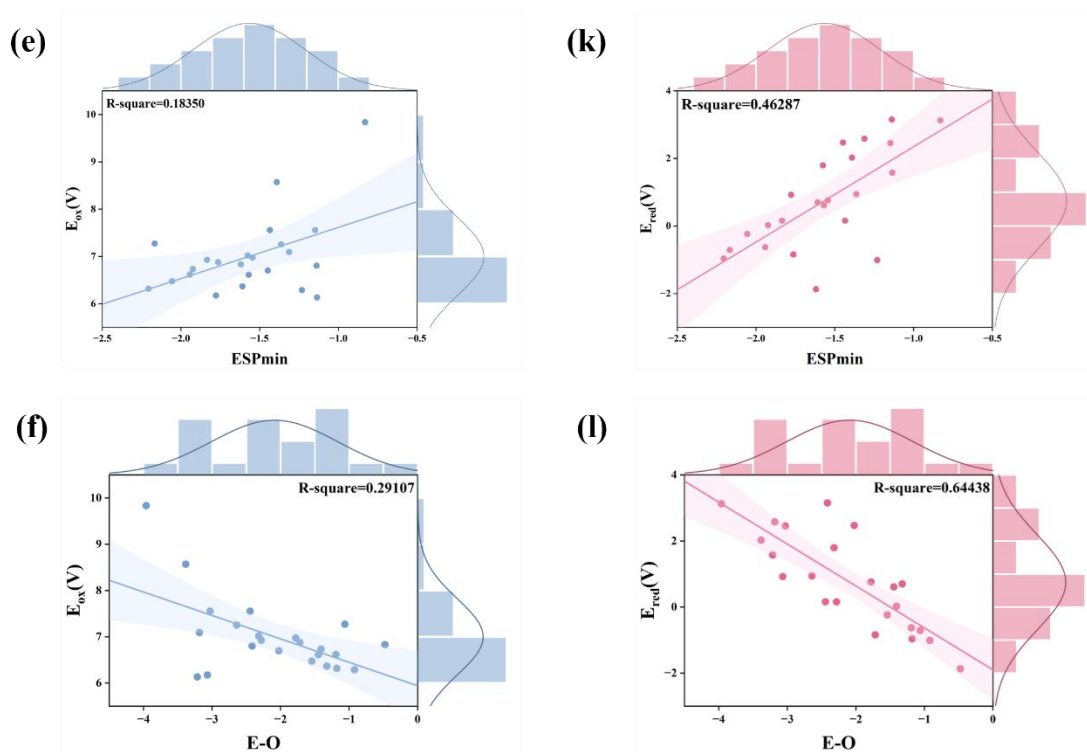

**Figure S10.** Scatter plots with linear regression of (a) HOMO, (b) LUMO, (c) ALIEmin, (d) ESPmax, (e) ESPmin, and (e) E-O to the oxidation potentials. Panels (g)–(l) show scatter plots with linear regression of them to reduction potentials.

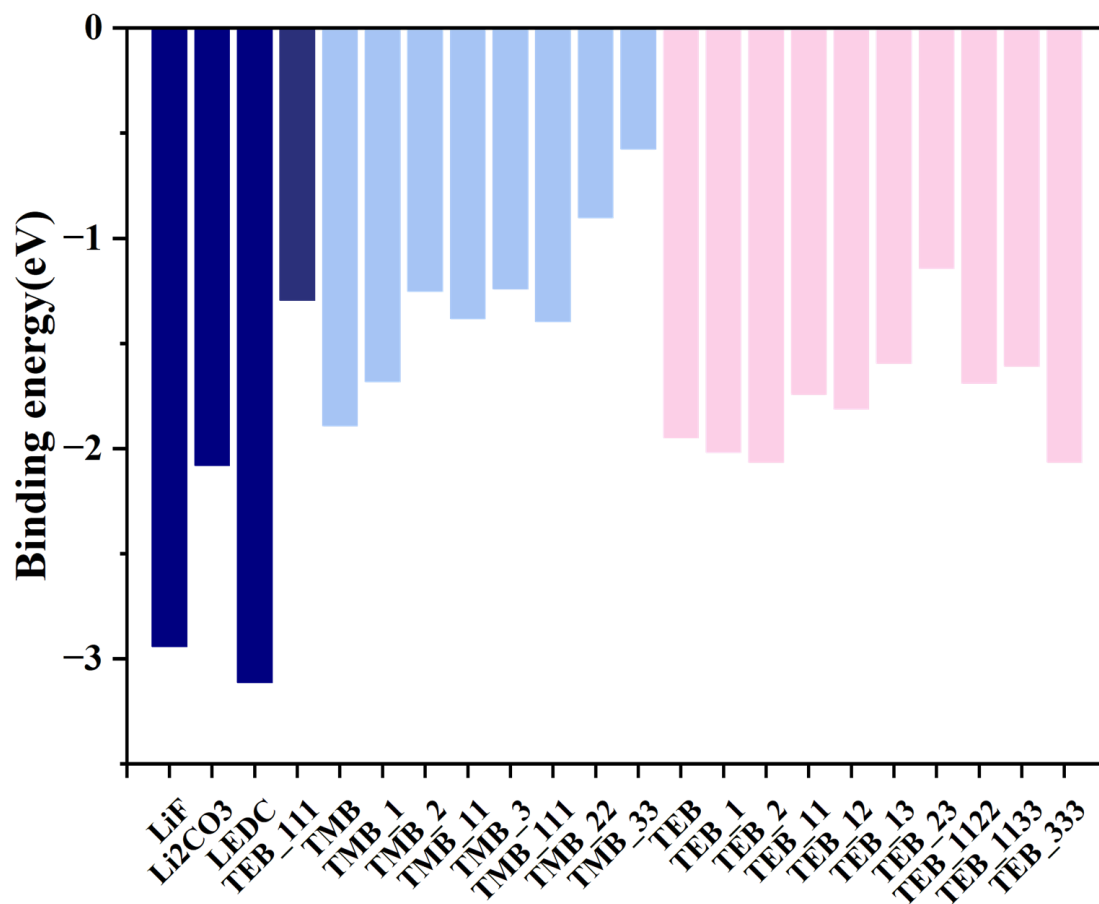

**Figure S11.** The binding energy of the oxidation decomposition products of each molecule to  $\text{Li}^+$  after binding to F.

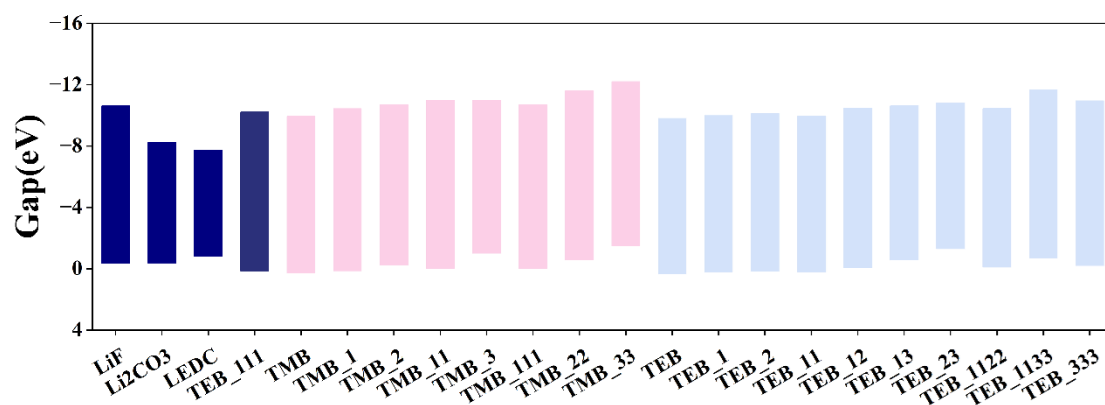

**Figure S12.** The energy gap of the oxidation decomposition products of each molecule to  $\text{Li}^+$  after binding to F.

**Table S1.** The oxidation and reduction potentials, as well as the frontier molecular orbital energies, of ethylene carbonate (EC), ethyl methyl carbonate (EMC), trimethyl borate (TMB), triethyl borate (TEB), and cyano-modified borate.

| Molecule | Number<br>of CN | $E_{ox}^0$ (V) [vs<br>Li/Li <sup>+</sup> ] | $E_{red}^0$ (V) [vs<br>Li/Li <sup>+</sup> ] | $\Delta E_{ox}^0$ (V) | $\Delta E_{red}^0$ (V) | HUMO<br>(eV) | LUMO<br>(eV) |
|----------|-----------------|--------------------------------------------|---------------------------------------------|-----------------------|------------------------|--------------|--------------|
| EC       | 0               | 7.27                                       | -0.71                                       | 0                     | 0                      | -10.19       | 0.43         |
| EMC      | 0               | 6.83                                       | -1.87                                       | -0.44                 | -1.16                  | -10.13       | 0.65         |
| TMB      | 0               | 6.32                                       | -0.96                                       | -0.95                 | -0.25                  | -9.40        | 0.34         |
| TMB_1    | 1               | 6.73                                       | 0.02                                        | -0.54                 | 0.73                   | -9.81        | 0.14         |
| TMB_2    | 2               | 6.98                                       | 0.76                                        | -0.29                 | 1.47                   | -10.02       | -0.10        |
| TMB_11   | 2               | 6.93                                       | 0.16                                        | -0.34                 | 0.87                   | -10.19       | 0.09         |
| TMB_3    | 3               | 7.02                                       | 1.79                                        | -0.25                 | 2.50                   | -10.16       | -0.77        |
| TMB_111  | 3               | 7.56                                       | 0.16                                        | 0.29                  | 0.87                   | -10.47       | -0.10        |
| TMB_22   | 4               | 7.26                                       | 0.94                                        | -0.01                 | 1.65                   | -10.66       | -0.39        |
| TMB_33   | 6               | 7.56                                       | 2.45                                        | 0.29                  | 3.16                   | -11.05       | -1.28        |
| TMB_222  | 6               | 8.57                                       | 2.02                                        | 1.30                  | 2.73                   | -11.55       | -0.67        |
| TMB_333  | 9               | 9.84                                       | 3.13                                        | 2.57                  | 3.84                   | -12.24       | -1.67        |
| TEB      | 0               | 6.29                                       | -1.01                                       | -0.98                 | -0.30                  | -9.47        | 0.34         |
| TEB_1    | 1               | 6.47                                       | -0.24                                       | -0.80                 | 0.47                   | -9.46        | 0.24         |
| TEB_2    | 2               | 6.37                                       | 0.70                                        | -0.90                 | 1.41                   | -9.65        | 0.20         |
| TEB_11   | 2               | 6.62                                       | -0.63                                       | -0.65                 | 0.08                   | -9.69        | 0.18         |
| TEB_111  | 3               | 6.88                                       | -0.84                                       | -0.39                 | -0.13                  | -10.00       | 0.09         |
| TEB_12   | 3               | 6.61                                       | 0.61                                        | -0.66                 | 1.32                   | -9.77        | 0.01         |
| TEB_13   | 4               | 6.70                                       | 2.47                                        | -0.57                 | 3.18                   | -9.87        | -0.50        |
| TEB_23   | 5               | 6.80                                       | 3.15                                        | -0.47                 | 3.86                   | -10.03       | -1.20        |
| TEB_1122 | 6               | 6.17                                       | 0.92                                        | -1.10                 | 1.63                   | -10.49       | -0.18        |
| TEB_1133 | 8               | 7.09                                       | 2.58                                        | -0.18                 | 3.29                   | -10.65       | -0.60        |
| TEB_333  | 9               | 6.13                                       | 1.58                                        | -1.14                 | 2.29                   | -10.85       | -0.25        |

**Table S2.** The length of the B-O bond and the O-C bond of each molecule.

| Molecule | Number<br>of CN | B-O(1) | O-C(1) | B-O(2) | O-C(2) | B-O(3) | O-C(3) |
|----------|-----------------|--------|--------|--------|--------|--------|--------|
| TMB      | 0               | 1.369  | 1.428  | 1.369  | 1.427  | 1.372  | 1.427  |
| TMB_1    | 1               | 1.360  | 1.432  | 1.361  | 1.432  | 1.379  | 1.416  |
| TMB_2    | 2               | 1.351  | 1.434  | 1.355  | 1.434  | 1.396  | 1.407  |
| TMB_11   | 2               | 1.354  | 1.431  | 1.380  | 1.416  | 1.373  | 1.414  |
| TMB_3    | 3               | 1.349  | 1.434  | 1.344  | 1.433  | 1.418  | 1.394  |
| TMB_111  | 3               | 1.365  | 1.422  | 1.366  | 1.423  | 1.365  | 1.422  |
| TMB_22   | 4               | 1.339  | 1.440  | 1.378  | 1.413  | 1.382  | 1.413  |
| TMB_33   | 6               | 1.328  | 1.445  | 1.388  | 1.409  | 1.384  | 1.409  |
| TMB_222  | 6               | 1.367  | 1.419  | 1.364  | 1.419  | 1.365  | 1.419  |
| TMB_333  | 9               | 1.364  | 1.419  | 1.365  | 1.419  | 1.365  | 1.419  |
| TEB      | 0               | 1.369  | 1.437  | 1.368  | 1.436  | 1.367  | 1.437  |
| TEB_1    | 1               | 1.364  | 1.437  | 1.365  | 1.436  | 1.380  | 1.420  |
| TEB_2    | 2               | 1.361  | 1.439  | 1.360  | 1.438  | 1.390  | 1.405  |
| TEB_11   | 2               | 1.361  | 1.439  | 1.372  | 1.420  | 1.375  | 1.421  |
| TEB_111  | 3               | 1.367  | 1.425  | 1.366  | 1.425  | 1.365  | 1.425  |
| TEB_12   | 3               | 1.352  | 1.444  | 1.355  | 1.443  | 1.396  | 1.400  |
| TEB_13   | 4               | 1.352  | 1.444  | 1.347  | 1.446  | 1.406  | 1.387  |
| TEB_23   | 5               | 1.340  | 1.449  | 1.347  | 1.447  | 1.416  | 1.383  |
| TEB_1122 | 6               | 1.344  | 1.447  | 1.386  | 1.402  | 1.377  | 1.401  |
| TEB_1133 | 8               | 1.336  | 1.449  | 1.387  | 1.396  | 1.382  | 1.390  |
| TEB_333  | 9               | 1.367  | 1.404  | 1.362  | 1.406  | 1.365  | 1.405  |

**Table S3.** The length of the B-O bond or the O-C bond of each molecule in the oxidation state

| Molecule | Number<br>of CN | B-O(1) | O-C(1) | B-O(2) | O-C(2) | B-O(3) | O-C(3) |
|----------|-----------------|--------|--------|--------|--------|--------|--------|
| TMB      | 0               | 1.326  | 1.441  | 1.342  | 1.433  | 1.454  | 1.379  |
| TMB_1    | 1               | 1.348  | 1.428  | 1.419  | 1.382  | 1.341  | 1.432  |
| TMB_2    | 2               | 1.413  | 1.381  | 1.342  | 1.429  | 1.352  | 1.423  |
| TMB_11   | 2               | 1.434  | 1.388  | 1.339  | 1.428  | 1.337  | 1.428  |
| TMB_3    | 3               | 1.334  | 1.429  | 1.407  | 1.383  | 1.357  | 1.422  |
| TMB_111  | 3               | 1.433  | 1.369  | 1.336  | 1.432  | 1.341  | 1.427  |
| TMB_22   | 4               | 1.447  | 1.349  | 1.340  | 1.433  | 1.338  | 1.430  |
| TMB_33   | 6               | 1.434  | 1.344  | 1.344  | 1.433  | 1.343  | 1.434  |
| TMB_222  | 6               | 1.417  | 1.368  | 1.340  | 1.429  | 1.348  | 1.432  |
| TMB_333  | 9               | 1.339  | 1.427  | 1.364  | 1.428  | 1.420  | 1.307  |
| TEB      | 0               | 1.439  | 1.378  | 1.331  | 1.452  | 1.346  | 1.445  |
| TEB_1    | 1               | 1.371  | 1.409  | 1.395  | 1.395  | 1.329  | 1.441  |
| TEB_2    | 2               | 1.345  | 1.440  | 1.417  | 1.381  | 1.345  | 1.425  |
| TEB_11   | 2               | 1.323  | 1.458  | 1.343  | 1.431  | 1.464  | 1.371  |
| TEB_111  | 3               | 1.440  | 1.346  | 1.341  | 1.438  | 1.334  | 1.435  |
| TEB_12   | 3               | 1.418  | 1.373  | 1.332  | 1.447  | 1.357  | 1.418  |
| TEB_13   | 4               | 1.330  | 1.449  | 1.413  | 1.372  | 1.365  | 1.406  |
| TEB_23   | 5               | 1.409  | 1.371  | 1.323  | 1.454  | 1.375  | 1.402  |
| TEB_1122 | 6               | 1.353  | 1.390  | 1.385  | 1.385  | 1.360  | 1.410  |
| TEB_1133 | 8               | 1.418  | 1.333  | 1.345  | 1.408  | 1.351  | 1.406  |
| TEB_333  | 9               | 1.359  | 1.406  | 1.381  | 1.383  | 1.357  | 1.411  |

**Table S4.** The electrostatic potential maximum and minimum values, as well as the Alie maximum and minimum values, of ethylene carbonate (EC), ethyl methyl carbonate (EMC), trimethyl borate (TMB), triethyl borate(TEB), and cyano-modified borate.

| Molecule | Number of CN | ESP(min\ev) | ESP(max\ev) | Alie(min\ev) | Alie(max\ev) |
|----------|--------------|-------------|-------------|--------------|--------------|
| EC       | 0            | -2.17       | 2.24        | 12.01        | 18.46        |
| EMC      | 0            | -1.62       | 0.93        | 12.37        | 17.28        |
| TMB      | 0            | -2.21       | 1.10        | 11.82        | 17.11        |
| TMB_1    | 1            | -1.92       | 1.33        | 12.26        | 17.35        |
| TMB_2    | 2            | -1.55       | 1.89        | 12.51        | 17.46        |
| TMB_11   | 2            | -1.84       | 2.36        | 12.28        | 17.53        |
| TMB_3    | 3            | -1.58       | 2.36        | 12.69        | 17.56        |
| TMB_111  | 3            | -1.44       | 1.89        | 12.40        | 17.59        |
| TMB_22   | 4            | -1.36       | 2.48        | 12.85        | 17.88        |
| TMB_33   | 6            | -1.15       | 2.70        | 13.26        | 17.74        |
| TMB_222  | 6            | -1.39       | 3.17        | 12.93        | 18.23        |
| TMB_333  | 9            | -0.83       | 3.65        | 13.48        | 17.27        |
| TEB      | 0            | -1.23       | 0.56        | 11.89        | 15.89        |
| TEB_1    | 1            | -2.06       | 1.23        | 11.90        | 16.15        |
| TEB_2    | 2            | -1.61       | 1.92        | 12.02        | 17.21        |
| TEB_11   | 2            | -1.94       | 1.61        | 12.10        | 16.36        |
| TEB_111  | 3            | -1.76       | 1.86        | 12.13        | 16.31        |
| TEB_12   | 3            | -1.57       | 2.79        | 12.33        | 17.52        |
| TEB_13   | 4            | -1.45       | 2.42        | 12.41        | 17.15        |
| TEB_23   | 5            | -1.14       | 2.23        | 12.55        | 17.32        |
| TEB_1122 | 6            | -1.78       | 3.77        | 12.62        | 17.66        |
| TEB_1133 | 8            | -1.31       | 3.65        | 12.77        | 17.25        |
| TEB_333  | 9            | -1.14       | 3.00        | 13.02        | 17.28        |

**Table S5.** The binding energies of ethylene carbonate (EC), ethyl methyl carbonate (EMC), trimethyl borate (TMB), triethyl borate (TEB), and cyano-modified borate with Li<sup>+</sup>, F<sup>-</sup>, HF, O<sub>2</sub><sup>-</sup>.

| Molecule | Number<br>of CN | Binding energy<br>of Li <sup>+</sup> (eV) | Binding energy<br>of F <sup>-</sup> (eV) | Binding energy<br>of HF (eV) | Binding energy<br>of O <sub>2</sub> <sup>-</sup> (eV) |
|----------|-----------------|-------------------------------------------|------------------------------------------|------------------------------|-------------------------------------------------------|
| LIDFOB   | 0               | -5.96                                     | /                                        | -0.54                        | /                                                     |
| TMSB     | 0               | -2.21                                     | -1.87                                    | -0.36                        | -1.40                                                 |
| ADN      | 2               | -1.88                                     | -1.20                                    | -0.36                        | -1.08                                                 |
| EC       | 0               | -2.21                                     | -1.03                                    | -0.23                        | -1.06                                                 |
| EMC      | 0               | -2.01                                     | -0.55                                    | -0.37                        | -0.48                                                 |
| TMB      | 0               | -2.53                                     | -0.71                                    | -0.36                        | -1.18                                                 |
| TMB_1    | 0               | -1.71                                     | -1.89                                    | -0.27                        | -1.41                                                 |
| TMB_2    | 1               | -1.20                                     | -2.31                                    | -0.25                        | -1.78                                                 |
| TMB_11   | 1               | -3.20                                     | -1.52                                    | -0.34                        | -2.28                                                 |
| TMB_3    | 2               | -1.30                                     | -1.27                                    | -0.47                        | -2.32                                                 |
| TMB_111  | 2               | -1.06                                     | -2.16                                    | -0.40                        | -2.45                                                 |
| TMB_22   | 2               | -1.46                                     | -3.25                                    | -0.27                        | -2.64                                                 |
| TMB_33   | 2               | -0.57                                     | -3.74                                    | -0.20                        | -3.03                                                 |
| TMB_222  | 3               | -2.46                                     | -4.13                                    | -0.26                        | -3.38                                                 |
| TMB_333  | 3               | -1.63                                     | -1.89                                    | -0.21                        | -3.96                                                 |
| TEB      | 3               | -1.95                                     | -1.30                                    | -0.36                        | -0.92                                                 |
| TEB_1    | 3               | -2.27                                     | -0.90                                    | -0.34                        | -1.55                                                 |
| TEB_2    | 4               | -2.45                                     | -0.96                                    | -0.33                        | -1.33                                                 |
| TEB_11   | 4               | -1.87                                     | -2.56                                    | -0.30                        | -1.19                                                 |
| TEB_111  | 5               | -0.95                                     | -2.60                                    | -0.20                        | -1.72                                                 |
| TEB_12   | 6               | -1.98                                     | -2.26                                    | -0.28                        | -1.45                                                 |
| TEB_13   | 6               | -1.77                                     | -2.51                                    | -0.22                        | -2.03                                                 |
| TEB_23   | 6               | -1.23                                     | -2.85                                    | -0.22                        | -2.42                                                 |
| TEB_1122 | 8               | -2.74                                     | -3.86                                    | -0.58                        | -3.07                                                 |
| TEB_1133 | 9               | -2.62                                     | -2.49                                    | -0.35                        | -3.18                                                 |
| TEB_333  | 9               | -0.99                                     | -3.78                                    | -0.47                        | -3.22                                                 |

**Table S6.** The contributions of cyano group and atom B, O, C, and H to the HOMO orbitals.

| Molecule | Number of<br>CN | B(HOMO\%) | O(HOMO\%) | C(HOMO\%) | -CN(HOMO\%) | H(HOMO\%) |
|----------|-----------------|-----------|-----------|-----------|-------------|-----------|
| TMB      | 0               | 5.333     | 62.247    | 15.109    | /           | 17.311    |
| TMB_1    | 1               | 5.587     | 60.868    | 15.496    | 0.262       | 17.787    |
| TMB_2    | 2               | 5.613     | 59.953    | 16.041    | 0.097       | 18.296    |
| TMB_11   | 2               | 5.036     | 52.275    | 16.460    | 8.760       | 17.469    |
| TMB_3    | 3               | 5.516     | 56.645    | 17.454    | 1.820       | 18.565    |
| TMB_111  | 3               | 4.069     | 45.148    | 19.664    | 14.799      | 16.320    |
| TMB_22   | 4               | 6.085     | 55.566    | 17.129    | 3.087       | 18.133    |
| TMB_33   | 6               | 6.357     | 51.321    | 18.720    | 4.230       | 19.372    |
| TMB_222  | 6               | 1.126     | 11.359    | 9.856     | 69.429      | 8.230     |
| TMB_333  | 9               | 0.264     | 3.050     | 1.801     | 94.885      | /         |
| TEB      | 0               | 4.979     | 54.781    | 18.770    | /           | 21.470    |
| TEB_1    | 1               | 4.812     | 55.055    | 19.844    | 0.213       | 20.076    |
| TEB_2    | 2               | 4.863     | 51.500    | 22.366    | 2.155       | 19.116    |
| TEB_11   | 2               | 4.854     | 57.271    | 18.529    | 1.140       | 18.206    |
| TEB_111  | 3               | 5.019     | 55.566    | 18.413    | 0.667       | 20.335    |
| TEB_12   | 3               | 4.829     | 52.209    | 24.204    | 0.234       | 18.524    |
| TEB_13   | 4               | 4.808     | 51.318    | 24.675    | 0.204       | 18.995    |
| TEB_23   | 5               | 4.606     | 48.311    | 21.824    | 1.053       | 24.206    |
| TEB_1122 | 6               | 4.186     | 40.331    | 24.681    | 6.945       | 23.857    |
| TEB_1133 | 8               | 4.710     | 38.775    | 27.607    | 2.338       | 26.570    |
| TEB_333  | 9               | 3.763     | 42.119    | 21.783    | 24.809      | 7.526     |

**Table S7.** The contributions of cyano group and atom B, O, C, and H to the LUMO orbitals.

| Molecule | Number of<br>CN | B(LUMO\%) | O(LUMO\%) | C(LUMO\%) | -CN(LUMO\%) | H(LUMO\%) |
|----------|-----------------|-----------|-----------|-----------|-------------|-----------|
| TMB      | 0               | 27.215    | 9.276     | 15.799    | /           | 47.710    |
| TMB_1    | 1               | 18.222    | 7.856     | 13.883    | 17.057      | 42.982    |
| TMB_2    | 2               | 10.541    | 9.101     | 13.154    | 52.851      | 14.353    |
| TMB_11   | 2               | 21.618    | 9.105     | 12.960    | 26.769      | 29.548    |
| TMB_3    | 3               | 3.426     | 10.962    | 13.133    | 71.923      | 0.556     |
| TMB_111  | 3               | 16.611    | 7.489     | 12.849    | 28.695      | 34.356    |
| TMB_22   | 4               | 8.077     | 10.800    | 14.117    | 57.616      | 9.390     |
| TMB_33   | 6               | 3.100     | 11.578    | 14.451    | 70.296      | 0.575     |
| TMB_222  | 6               | 6.490     | 11.850    | 14.974    | 59.362      | 7.324     |
| TMB_333  | 9               | 3.473     | 12.310    | 69.063    | 15.154      | /         |
| TEB      | 0               | 20.285    | 5.164     | 15.793    | /           | 58.758    |
| TEB_1    | 1               | 18.088    | 5.207     | 14.248    | 12.648      | 49.773    |
| TEB_2    | 2               | 9.187     | 4.042     | 12.431    | 38.140      | 36.200    |
| TEB_11   | 2               | 17.792    | 5.232     | 14.144    | 14.025      | 48.807    |
| TEB_111  | 3               | 14.292    | 4.063     | 14.048    | 15.821      | 51.785    |
| TEB_12   | 3               | 6.028     | 3.667     | 13.751    | 55.273      | 21.281    |
| TEB_13   | 4               | 1.162     | 2.073     | 22.556    | 71.972      | 2.237     |
| TEB_23   | 5               | 0.600     | 3.278     | 25.570    | 70.154      | 0.398     |
| TEB_1122 | 6               | 9.704     | 5.149     | 12.062    | 51.265      | 21.820    |
| TEB_1133 | 8               | 0.688     | 2.099     | 23.452    | 71.839      | 1.922     |
| TEB_333  | 9               | 3.808     | 2.795     | 13.557    | 62.076      | 17.764    |

**Table S8.** The symmetry-adapted perturbation theory (SAPT) energy decomposition results of the binding energies of F<sup>-</sup> and all molecules.

| Molecule | Number<br>of CN | Electrostatics<br>(eV) | Exchange<br>(eV) | Induction<br>(eV) | Dispersion<br>(eV) | Electrostatics<br>(eV) |
|----------|-----------------|------------------------|------------------|-------------------|--------------------|------------------------|
| TMB      | 0               | -1.294                 | 1.176            | -0.809            | -0.177             | -1.294                 |
| TMB_1    | 1               | -6.933                 | 6.142            | -4.054            | -0.614             | -6.933                 |
| TMB_2    | 2               | -7.424                 | 6.379            | -4.302            | -0.635             | -7.424                 |
| TMB_11   | 2               | -2.446                 | 1.821            | -1.177            | -0.238             | -2.446                 |
| TMB_3    | 3               | -2.009                 | 1.473            | -0.963            | -0.204             | -2.009                 |
| TMB_111  | 3               | -9.987                 | 12.585           | -9.198            | -0.957             | -9.987                 |
| TMB_22   | 4               | -8.458                 | 6.650            | -4.627            | -0.663             | -8.458                 |
| TMB_33   | 6               | -8.750                 | 6.920            | -5.405            | -0.659             | -8.750                 |
| TMB_222  | 6               | -9.426                 | 6.870            | -4.906            | -0.693             | -9.426                 |
| TMB_333  | 9               | -7.271                 | 10.071           | -6.024            | -0.784             | -7.271                 |
| TEB      | 0               | -6.271                 | 6.115            | -4.008            | -0.628             | -6.271                 |
| TEB_1    | 1               | -1.551                 | 1.370            | -0.963            | -0.286             | -1.551                 |
| TEB_2    | 2               | -1.696                 | 1.339            | -0.956            | -0.203             | -1.696                 |
| TEB_11   | 2               | -7.290                 | 6.349            | -4.350            | -0.636             | -7.290                 |
| TEB_111  | 3               | -7.764                 | 6.343            | -4.099            | -0.665             | -7.764                 |
| TEB_12   | 3               | -7.555                 | 6.440            | -4.364            | -0.664             | -7.555                 |
| TEB_13   | 4               | -7.734                 | 6.527            | -4.439            | -0.680             | -7.734                 |
| TEB_23   | 5               | -7.883                 | 6.749            | -5.123            | -0.634             | -7.883                 |
| TEB_1122 | 6               | -8.550                 | 6.884            | -5.364            | -0.838             | -8.550                 |
| TEB_1133 | 8               | -3.827                 | 2.816            | -1.951            | -0.347             | -3.827                 |
| TEB_333  | 9               | -9.059                 | 6.926            | -4.848            | -0.742             | -9.059                 |

**Table S9.** The symmetry-adapted perturbation theory (SAPT) energy decomposition results of the binding energies of HF and all molecules.

| Molecule | Number<br>of CN | Electrostatics<br>(eV) | Exchange<br>(eV) | Induction<br>(eV) | Dispersion<br>(eV) | Electrostatics<br>(eV) |
|----------|-----------------|------------------------|------------------|-------------------|--------------------|------------------------|
| TMB      | 0               | -0.671                 | 0.569            | -0.287            | -0.126             | -0.671                 |
| TMB_1    | 1               | -0.584                 | 0.619            | -0.299            | -0.148             | -0.584                 |
| TMB_2    | 2               | -0.447                 | 0.421            | -0.224            | -0.120             | -0.447                 |
| TMB_11   | 2               | -0.541                 | 0.508            | -0.246            | -0.118             | -0.541                 |
| TMB_3    | 3               | -0.401                 | 0.398            | -0.207            | -0.118             | -0.401                 |
| TMB_111  | 3               | -0.553                 | 0.500            | -0.264            | -0.141             | -0.553                 |
| TMB_22   | 4               | -0.486                 | 0.414            | -0.208            | -0.159             | -0.486                 |
| TMB_33   | 6               | -0.406                 | 0.345            | -0.145            | -0.171             | -0.406                 |
| TMB_222  | 6               | -0.549                 | 0.378            | -0.167            | -0.187             | -0.549                 |
| TMB_333  | 9               | -0.456                 | 0.382            | -0.141            | -0.200             | -0.456                 |
| TEB      | 0               | -0.763                 | 0.739            | -0.373            | -0.169             | -0.763                 |
| TEB_1    | 1               | -0.673                 | 0.608            | -0.307            | -0.142             | -0.673                 |
| TEB_2    | 2               | -0.630                 | 0.572            | -0.278            | -0.165             | -0.630                 |
| TEB_11   | 2               | -0.625                 | 0.601            | -0.287            | -0.147             | -0.625                 |
| TEB_111  | 3               | -0.575                 | 0.691            | -0.296            | -0.196             | -0.575                 |
| TEB_12   | 3               | -0.667                 | 0.701            | -0.341            | -0.170             | -0.667                 |
| TEB_13   | 4               | -0.356                 | 0.350            | -0.166            | -0.126             | -0.356                 |
| TEB_23   | 5               | -0.370                 | 0.384            | -0.172            | -0.134             | -0.370                 |
| TEB_1122 | 6               | -0.821                 | 0.795            | -0.411            | -0.224             | -0.821                 |
| TEB_1133 | 8               | -0.616                 | 0.639            | -0.287            | -0.190             | -0.616                 |
| TEB_333  | 9               | -0.567                 | 0.557            | -0.270            | -0.152             | -0.567                 |

**Table S10.** The binding energies of TEB\_1122, TEB\_333, TMB\_33, and TMB\_22 with F<sup>-</sup>, and the activation energy barriers of their side reactions with F<sup>-</sup>.

| Molecule | Number of CN | Binding energy of F <sup>-</sup><br>(eV) | activation energy<br>barrier (kcal/mol) |
|----------|--------------|------------------------------------------|-----------------------------------------|
| TEB_1122 | 6            | -3.86                                    | 0.8422                                  |
| TEB_333  | 9            | -3.78                                    | 0.0015                                  |
| TMB_33   | 6            | -3.74                                    | 0.5594                                  |
| TMB_22   | 4            | -3.25                                    | 42.0266                                 |

**Table S11.** The binding energies of TMB\_333, TMB\_222, and TEB\_333 with O<sub>2</sub><sup>-</sup>, and the activation energy barriers of their side reactions with O<sub>2</sub><sup>-</sup>.

| Molecule | Number of CN | Binding energy of O <sub>2</sub> <sup>-</sup><br>(eV) | activation energy<br>barrier (kcal/mol) |
|----------|--------------|-------------------------------------------------------|-----------------------------------------|
| TMB_333  | 9            | -3.96                                                 | 0.0006                                  |
| TMB_222  | 6            | -3.38                                                 | 0.6804                                  |
| TEB_333  | 9            | -3.22                                                 | 60.1432                                 |

**Table S12.** The number of lithium salts and solvents used in molecular dynamics calculations.

| Molecule | Number of CN | Li | FSI | number |
|----------|--------------|----|-----|--------|
| TMB      | 0            | 15 | 15  | 507    |
| TMB_1    | 1            | 15 | 15  | 409    |
| TMB_2    | 2            | 15 | 15  | 342    |
| TMB_11   | 2            | 15 | 15  | 342    |
| TMB_3    | 3            | 15 | 15  | 294    |
| TMB_111  | 3            | 15 | 15  | 294    |
| TMB_22   | 4            | 15 | 15  | 258    |
| TMB_222  | 6            | 15 | 15  | 207    |
| TMB_33   | 6            | 15 | 15  | 207    |
| TMB_333  | 9            | 15 | 15  | 160    |

**Table S13.** Table of the coordination number of lithium ions and FSI<sup>-</sup> as well as the Li<sup>+</sup> transference number.

| Molecule | Number of CN | Li-O_FSI | t <sub>Li</sub> |
|----------|--------------|----------|-----------------|
| TMB      | 0            | 4.48     | 0.486           |
| TMB_1    | 1            | 4.45     | 0.428           |
| TMB_2    | 2            | 4.25     | 0.489           |
| TMB_11   | 2            | 4.38     | 0.496           |
| TMB_3    | 3            | 4.23     | 0.483           |
| TMB_111  | 3            | 4.31     | 0.493           |
| TMB_22   | 4            | 4.42     | 0.482           |
| TMB_222  | 6            | 4.3      | 0.517           |
| TMB_33   | 6            | 4.22     | 0.496           |
| TMB_333  | 9            | 4.16     | 0.437           |

**Table S14.** Table of the coordination number of lithium ions and  $\text{PF}_6^-$  as well as the  $\text{Li}^+$  transference number.

| Molecule | Number of CN | Li-F_ $\text{PF}_6^-$ | $t_{\text{Li}}$ |
|----------|--------------|-----------------------|-----------------|
| TMB      | 0            | 0.143                 | 1.13            |
| TMB_1    | 1            | 0.149                 | 0.728           |
| TMB_3    | 3            | 0.153                 | 0.771           |
| TMB_22   | 4            | 0.272                 | 0.996           |
| TMB_333  | 9            | 0.15                  | 0.686           |

**Table S15.** List of the descriptors.

| <b>Descriptor</b> | <b>Name</b>                                   | <b>unit</b> |
|-------------------|-----------------------------------------------|-------------|
| NCN               | Number of nitrile groups                      |             |
| <b>Eox</b>        | Oxidation potential                           | V           |
| <b>Ered</b>       | Reduction potential                           | V           |
| <b>HOMO</b>       | Highest occupied orbital energy               | eV          |
| <b>LUMO</b>       | Lowest of unoccupied orbital energy           | eV          |
| <b>ESPmax</b>     | Maximum electrostatic potential               | eV          |
| <b>ESPmin</b>     | Minimum electrostatic potential               | eV          |
| <b>ALIEmax</b>    | Maximum average local ionization energy       | eV          |
| <b>ALIEmin</b>    | Minimum average local ionization energy       | eV          |
| <b>MPI</b>        | Molecular polarity index                      | eV          |
| <b>DM</b>         | Dipole moment                                 | Debye       |
| <b>E-Li</b>       | Binding energy of Li <sup>+</sup>             | eV          |
| <b>E-O</b>        | Binding energy of O <sub>2</sub> <sup>-</sup> | eV          |
| <b>E-HF</b>       | Binding energy of HF                          | eV          |
| <b>E-F</b>        | Binding energy of F <sup>-</sup>              | eV          |

**Table S16.** The HOMO, LUMO, energy gap size, and binding energy of Li<sup>+</sup> of the B-F products after oxidative decomposition.

| Molecule                        | Number of CN | HOMO(eV) | LUMO(eV) | Gap(eV) | Binding energy<br>of Li <sup>+</sup> (eV) |
|---------------------------------|--------------|----------|----------|---------|-------------------------------------------|
| LiF                             | 0            | -10.61   | -0.33    | 10.28   | -2.942                                    |
| Li <sub>2</sub> CO <sub>3</sub> | 0            | -8.22    | -0.37    | 7.85    | -2.081                                    |
| LEDC                            | 0            | -7.73    | -0.78    | 6.94    | -3.113                                    |
| TEB_111                         | 3            | -10.21   | 0.16     | 10.37   | -1.294                                    |
| TMB                             | 0            | -9.94    | 0.30     | 10.24   | -1.891                                    |
| TMB_1                           | 1            | -10.43   | 0.14     | 10.58   | -1.681                                    |
| TMB_2                           | 2            | -10.68   | -0.22    | 10.45   | -1.252                                    |
| TMB_11                          | 2            | -10.96   | 0.00     | 10.96   | -1.381                                    |
| TMB_3                           | 3            | -10.96   | -1.00    | 9.96    | -1.241                                    |
| TMB_111                         | 3            | -10.71   | -0.02    | 10.69   | -1.396                                    |
| TMB_22                          | 4            | -11.61   | -0.56    | 11.05   | -0.903                                    |
| TMB_33                          | 6            | -12.19   | -1.49    | 10.71   | -0.575                                    |
| TEB                             | 0            | -9.80    | 0.35     | 10.15   | -1.947                                    |
| TEB_1                           | 1            | -9.98    | 0.22     | 10.19   | -2.019                                    |
| TEB_2                           | 2            | -10.12   | 0.18     | 10.30   | -2.064                                    |
| TEB_11                          | 2            | -9.94    | 0.25     | 10.19   | -1.742                                    |
| TEB_12                          | 3            | -10.21   | 0.16     | 10.37   | -1.294                                    |
| TEB_13                          | 4            | -10.47   | -0.06    | 10.40   | -1.811                                    |
| TEB_23                          | 5            | -10.61   | -0.56    | 10.04   | -1.593                                    |
| TEB_1122                        | 6            | -10.82   | -1.28    | 9.53    | -1.144                                    |
| TEB_1133                        | 8            | -10.45   | -0.09    | 10.36   | -1.689                                    |
| TEB_333                         | 9            | -11.66   | -0.66    | 11.00   | -1.608                                    |

**Table S17.** The dipole moments and molecular polarity index of all molecules at the liquid-phase computational level.

| Molecule | Number of CN | Molecular polarity<br>index(eV) | Dipole Moment<br>(Debye) |
|----------|--------------|---------------------------------|--------------------------|
| EC       | 0            | 1.27                            | 7.476                    |
| EMC      | 0            | 0.59                            | 0.563                    |
| TMB      | 0            | 0.64                            | 3.829                    |
| TMB_1    | 1            | 0.68                            | 5.225                    |
| TMB_2    | 2            | 0.74                            | 6.082                    |
| TMB_11   | 2            | 1.12                            | 7.551                    |
| TMB_3    | 3            | 0.82                            | 8.479                    |
| TMB_111  | 3            | 1.08                            | 0.358                    |
| TMB_22   | 4            | 0.94                            | 5.701                    |
| TMB_33   | 6            | 0.78                            | 5.626                    |
| TMB_222  | 6            | 1.04                            | 6.495                    |
| TMB_333  | 9            | 0.80                            | 0.069                    |
| TEB      | 0            | 0.29                            | 0.004                    |
| TEB_1    | 1            | 0.70                            | 7.316                    |
| TEB_2    | 2            | 0.68                            | 5.162                    |
| TEB_11   | 2            | 0.88                            | 2.351                    |
| TEB_111  | 3            | 1.06                            | 0.003                    |
| TEB_12   | 3            | 0.69                            | 4.922                    |
| TEB_13   | 4            | 0.65                            | 6.543                    |
| TEB_23   | 5            | 0.60                            | 6.174                    |
| TEB_1122 | 6            | 1.23                            | 15.847                   |
| TEB_1133 | 8            | 0.93                            | 9.248                    |
| TEB_333  | 9            | 0.95                            | 6.642                    |

**Table S18.** The energy gap, minimum electrostatic potential, binding energy of Li<sup>+</sup>, molecular polarity index of ethylene carbonate (EC), propylene carbonate (PC), ethyl methyl carbonate (EMC), diethyl carbonate (DC), ethyl acetate (EA) and candidate solvent molecules.

| Molecule | Number of CN | Energy Gap(eV) | ESP(min\ eV) | Binding energy of Li <sup>+</sup> (eV) | Molecular polarity index(eV) |
|----------|--------------|----------------|--------------|----------------------------------------|------------------------------|
| EC       | 0            | 10.62          | -2.17        | -2.21                                  | 1.27                         |
| PC       | 0            | 10.72          | -2.19        | -2.25                                  | 1.15                         |
| EMC      | 0            | 10.77          | -1.62        | -2.01                                  | 0.59                         |
| DEC      | 0            | 10.69          | -1.65        | -2.06                                  | 0.54                         |
| EA       | 0            | 10.33          | -1.84        | -2.08                                  | 0.56                         |
| TMB_11   | 2            | 10.28          | -1.84        | -3.20                                  | 1.12                         |
| TMB_111  | 3            | 10.38          | -1.44        | -1.06                                  | 1.08                         |
| TMB_222  | 6            | 10.88          | -1.39        | -2.46                                  | 1.04                         |
| TMB_333  | 9            | 10.56          | -0.83        | -1.63                                  | 0.80                         |
| TEB_111  | 3            | 10.09          | -1.76        | -0.95                                  | 1.06                         |
